# Supplementary material for: The NMDA receptor regulates competition of epithelial cells in the Drosophila wing
Source: PubMed Central journal article supplement (PMC7203100; doi:10.1038/s41467-020-16070-6), 2020-05-06
Supplement: 41467_2020_16070_MOESM1_ESM.pdf [file 41467_2020_16070_MOESM1_ESM.pdf]

Supplementary Information

# **The NMDA receptor regulates competition of epithelial cells**

Banreti and Meier, 2020

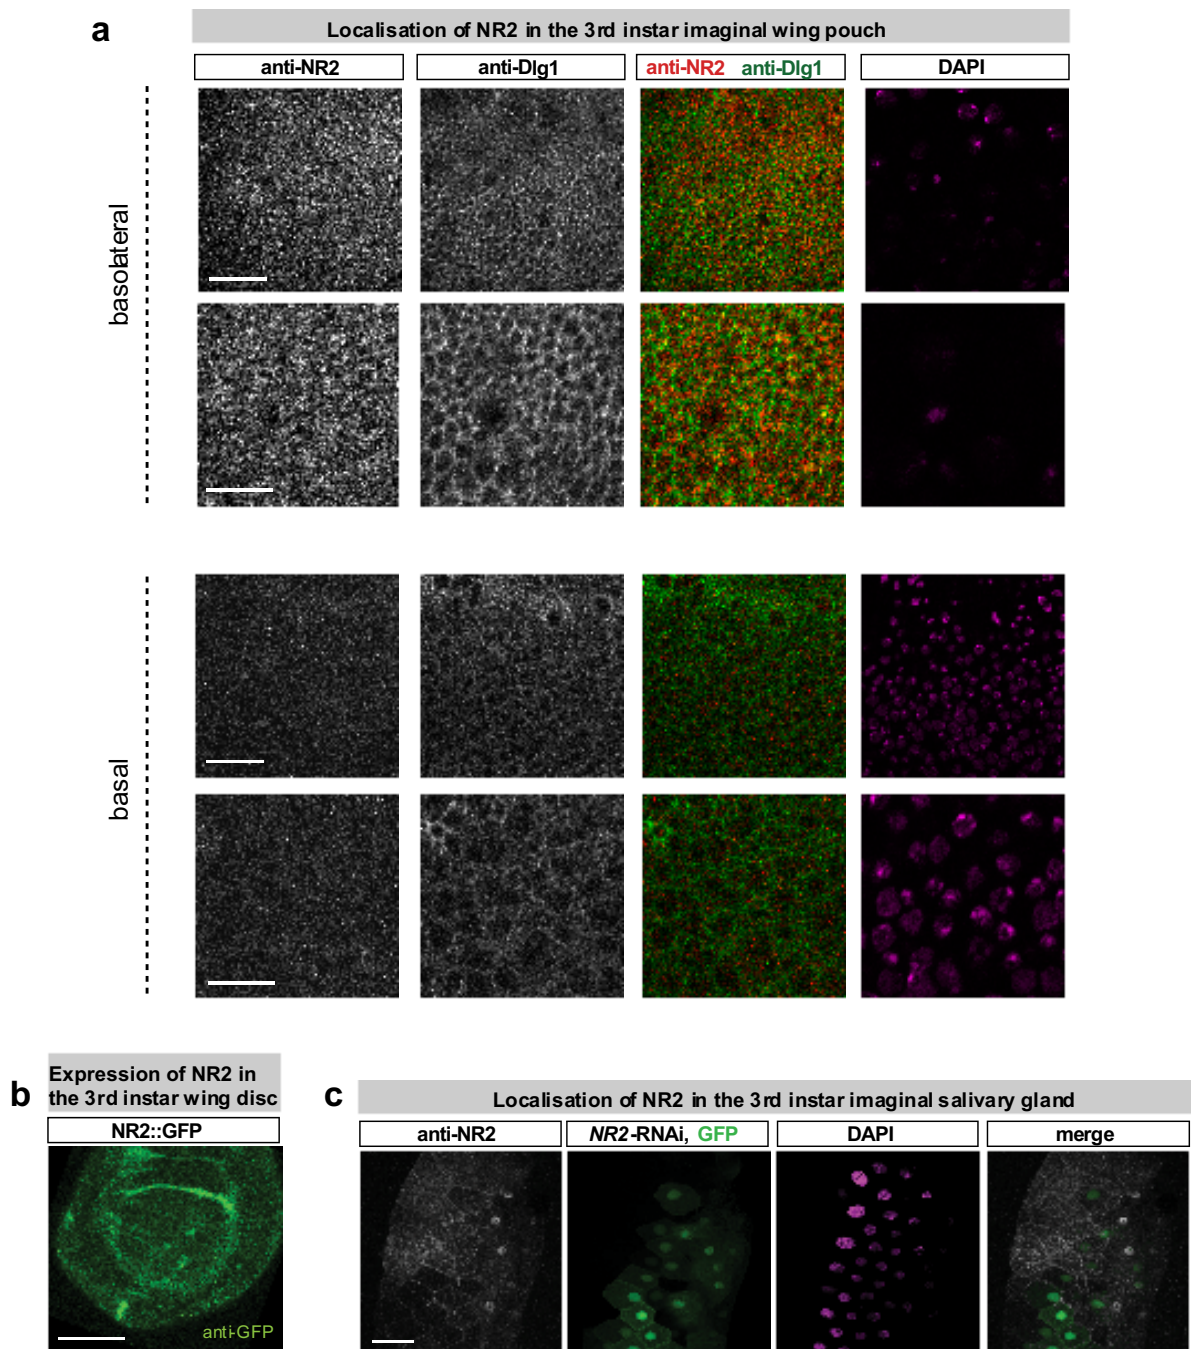

**Supplementary Figure 1. Expression of NR2 in wing discs and salivary glands**

**a**, Localisation and expression of NR2 and Dlg1 in the wing disc of third instar larvae was evaluated using the indicated antibodies. Septate junctions are marked with anti-Dlg1. Scale bars 20  $\mu$ m and 10  $\mu$ m. **b**, Expression analysis of NR2 in the wing disc of third instar larvae. A protein trap line that carries eGFP in frame with NR2 was used to monitor NR2 expression. Shown is a confocal image of a wing disc stained with anti-GFP (NR2). Scale bar 100  $\mu$ m. **c**, Expression analysis of NR2 in salivary glands. Immunostaining with anti-NR2 antibodies in salivary glands in which NR2 was downregulated in clones. RNAi clones are marked by GFP. Scale bar 100  $\mu$ m. Experiments were repeated two independent times. See Supplementary Table 1 for genotypes.

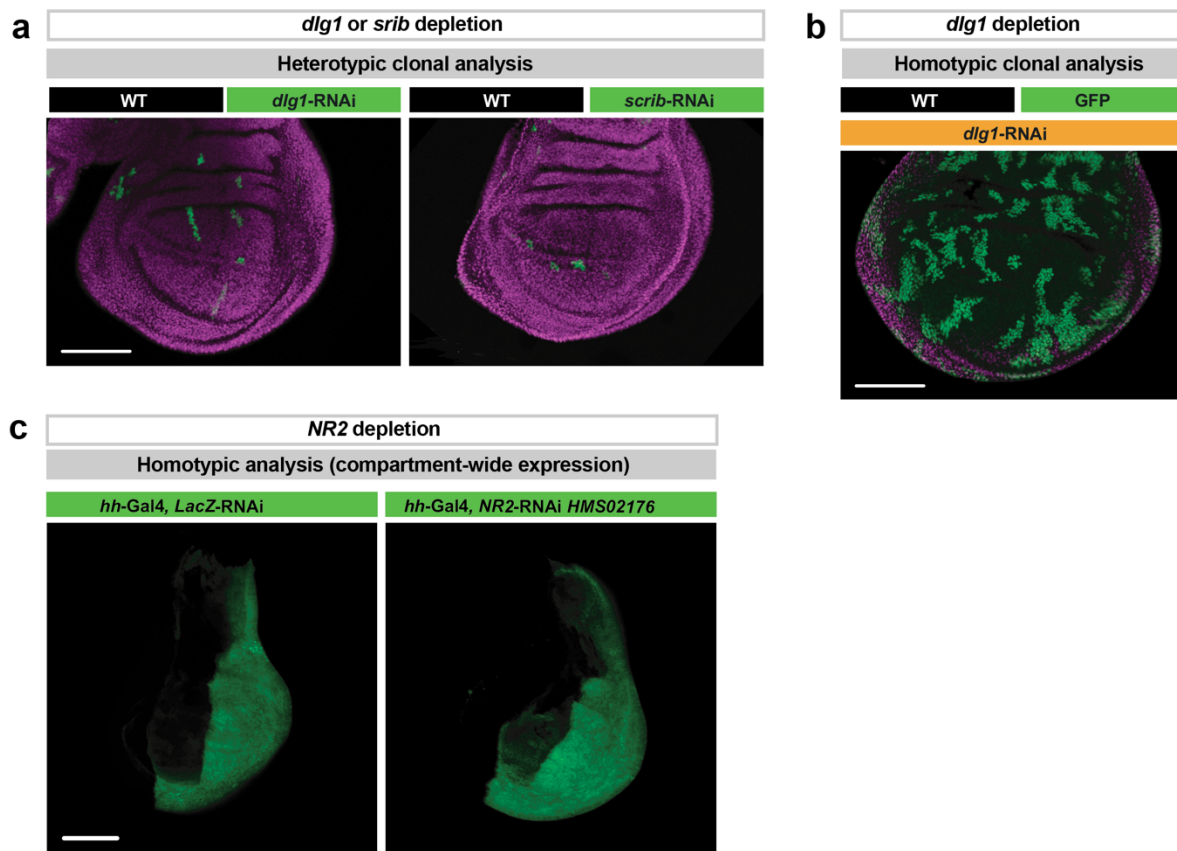

### Supplementary Figure 2. Context-dependent elimination of loser clones

**a**, Heterotypic clonal analysis. The indicated genes were knocked down in *GFP*-marked clones as depicted in Fig. 1d. Scale bar 100  $\mu$ m. **b**, Homotypic clonal analysis. *dlg1* was knocked down throughout the wing pouch as described in Figure 1f. *GFP*-marked clones represent pseudo-clones. Scale bar 100  $\mu$ m. **c**, Homotypic analysis. The indicated genes were knocked down throughout the posterior compartment of the wing pouch. Experiments were repeated two independent times. Scale bar 100  $\mu$ m. See Supplementary Table 1 for genotypes. All experiments, apart from c, were repeated three independent times.

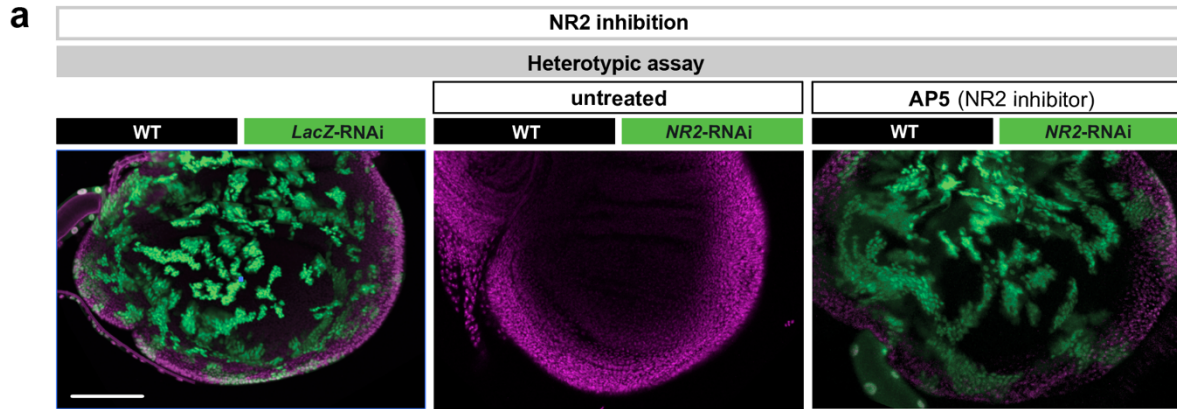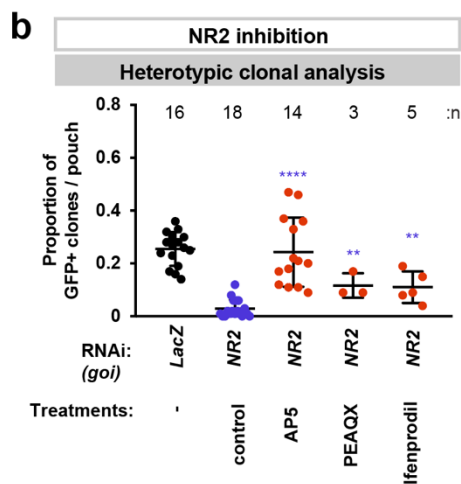

**Supplementary Figure 3. Inhibition of NR2 with AP5 antagonist prevents cell competition**

**a**, Heterotypic clonal analysis in the presence or absence of AP5, an inhibitor of NR2. Scale bar 100  $\mu$ m. Experiments were repeated three independent times. **b**, Quantification of the NR2 agonists treatment assays. Error bars represent average occupancy of the indicated RNAi clones per wing pouch  $\pm$  SD. \*\*\*\* $P$ <0.0001, \*\*\* $P$ <0.001, \*\* $P$ <0.01, \* $P$ <0.1 by two-sided Mann-Whitney nonparametric  $U$ -test. (NR2-RNAi + PEAQX vs. NR2-RNAi not treated \*\* $P$  value: 0.0060; NR2-RNAi + Ifenprodil vs. NR2-RNAi not treated \*\* $P$  value: 0.0028).  $n$  depicts the number of wing discs. See Supplementary Table 1 for genotypes.



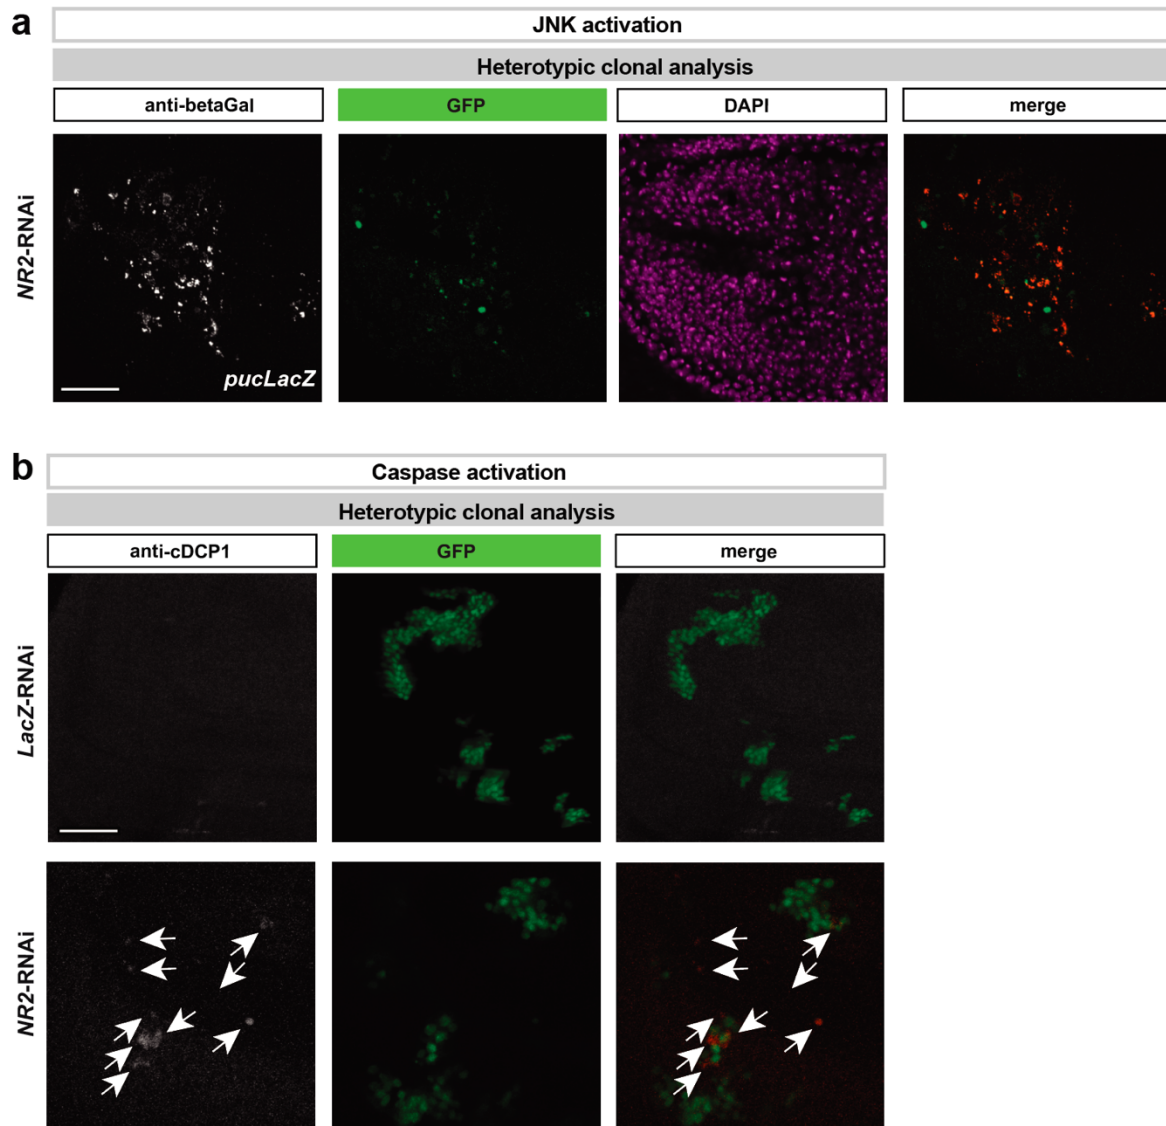

**Supplementary Figure 4. NR2 loser clones are eliminated by apoptosis via the Eiger>JNK signalling axis**

**a**, Heterotypic clonal analysis of third instar wing discs. *PucLacZ*, expression as a marker of *JNK* activity was revealed with anti- $\beta$ Gal staining. Scale bar 50  $\mu$ m. Experiment was repeated two independent times. **b**, Confocal images of wing discs that were immunostained with anti-cleaved DCP1. Scale bar 50  $\mu$ m. Experiments were repeated three independent times. See Supplementary Table 1 for genotypes.

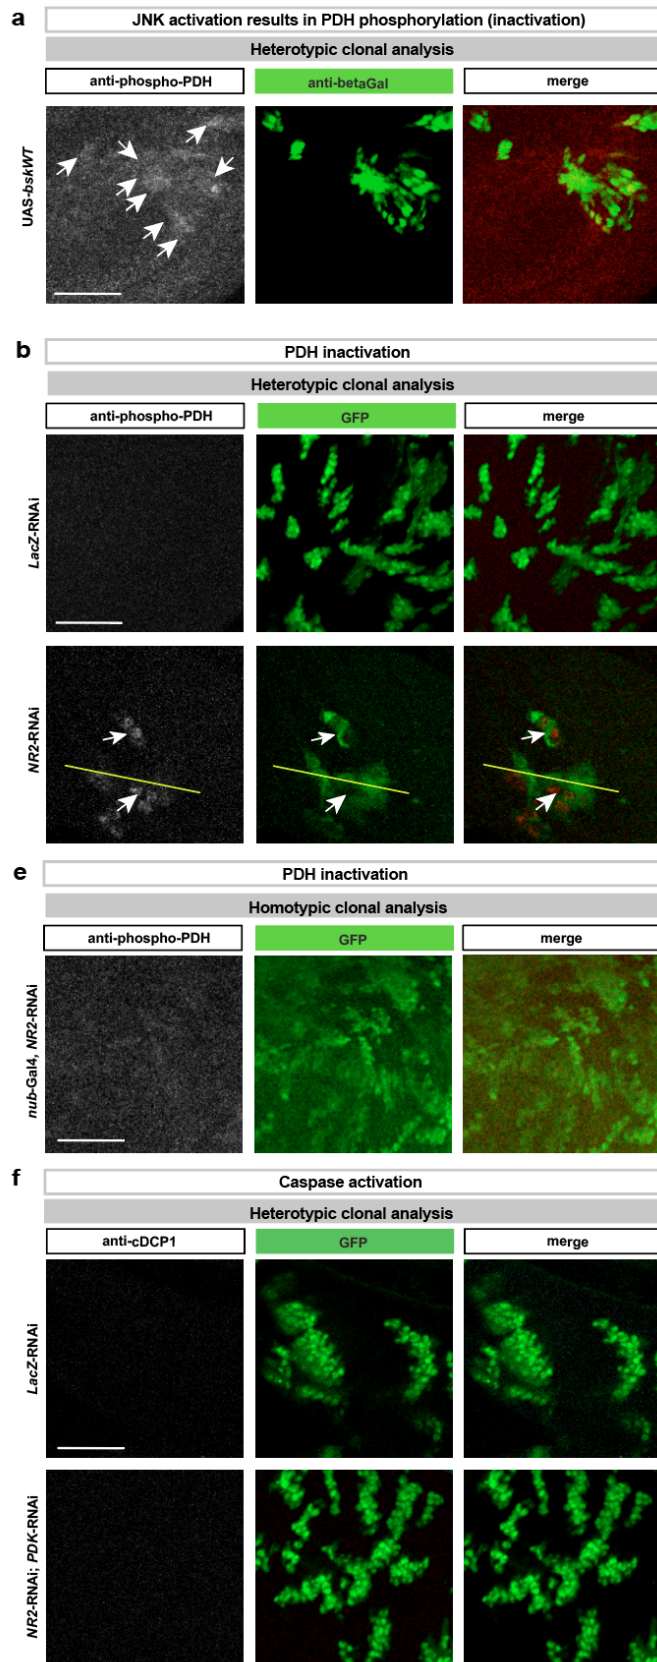

**c** Fluorescent signal intensity of GFP (NR2-RNAi) versus p-PDH

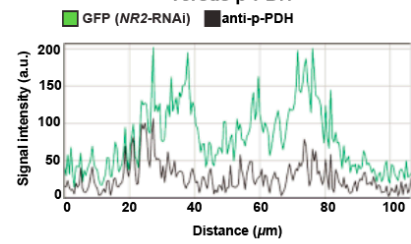

**d** Pearson's Correlation

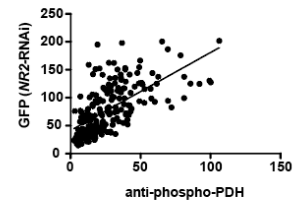

Supplementary Figure 5. NR2 controls cell competition by regulating lactate-mediated metabolic coupling between winners and losers

**a-b**, Confocal images of anti- $\beta$ Gal (marking *UAS-LacZ* clones) and anti-phospho-PDH (reading out its inactivation) stained wing pouches. Scale bar 50  $\mu$ m. **c**, Fluorescent intensities of phospho-PDH (black) and GFP (green) are measured by ImageJ software at the yellow line. Experiments were repeated three independent times. **d**, Pearson's correlation analysis of phospho-PDH and GFP. **e**, Homotypic analysis. Confocal images of anti-phospho-PDH stained wing pouches. Scale bar 50  $\mu$ m. **f**, Confocal images of third instar imaginal wing discs that were immunostained for cleaved DCP1 as a readout of caspase activation and apoptosis. Scale bar 50  $\mu$ m. Experiments were repeated two independent times, unless stated otherwise. See Supplementary Table 1 for genotypes.

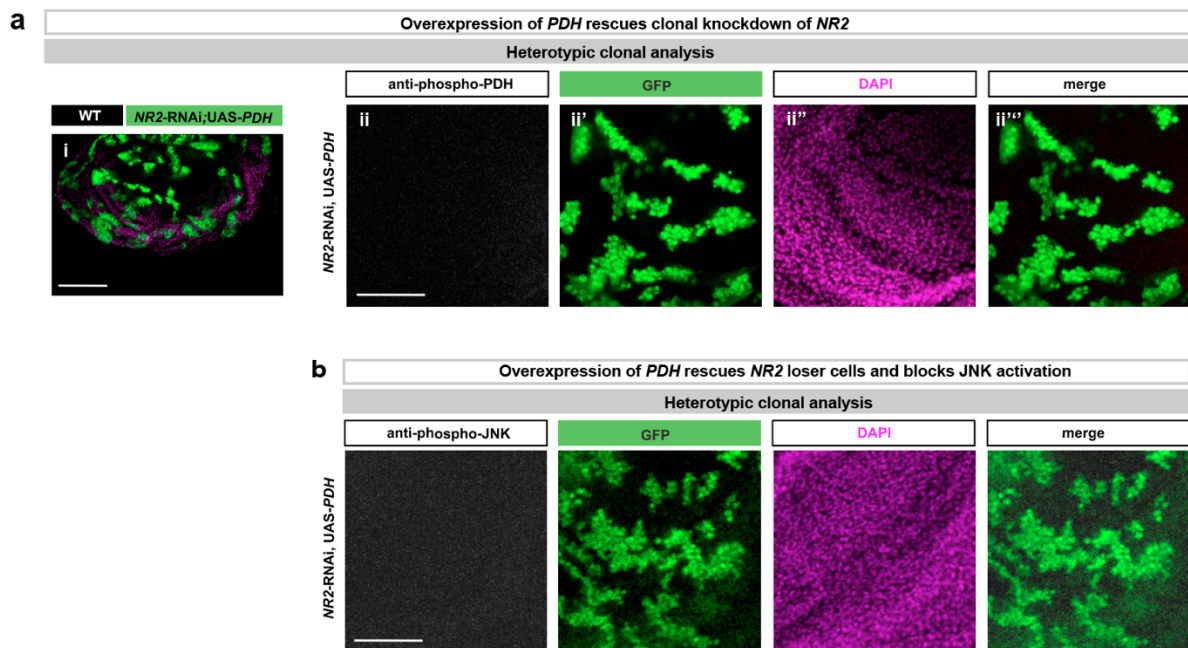

**Supplementary Figure 6. The TNF>JNK>PDK>PDH signalling axis reprograms the metabolism of *NR2* loser clones**

**a**, Heterotypic clonal analysis. The indicated gene-of-interest (*goi*) was over-expressed (*UAS-PDH*) in GFP-marked *NR2-RNAi* clones, and stained for anti-phospho-PDH (**ii**). Clones are marked by GFP (green). Scale bar 100  $\mu$ m (**i**) or 50  $\mu$ m (**ii**). **b**, Confocal images of wing discs that were immunostained with anti-phospho-JNK. Scale bar 100  $\mu$ m. Experiments were repeated three independent times. See Supplementary Table 1 for genotypes.



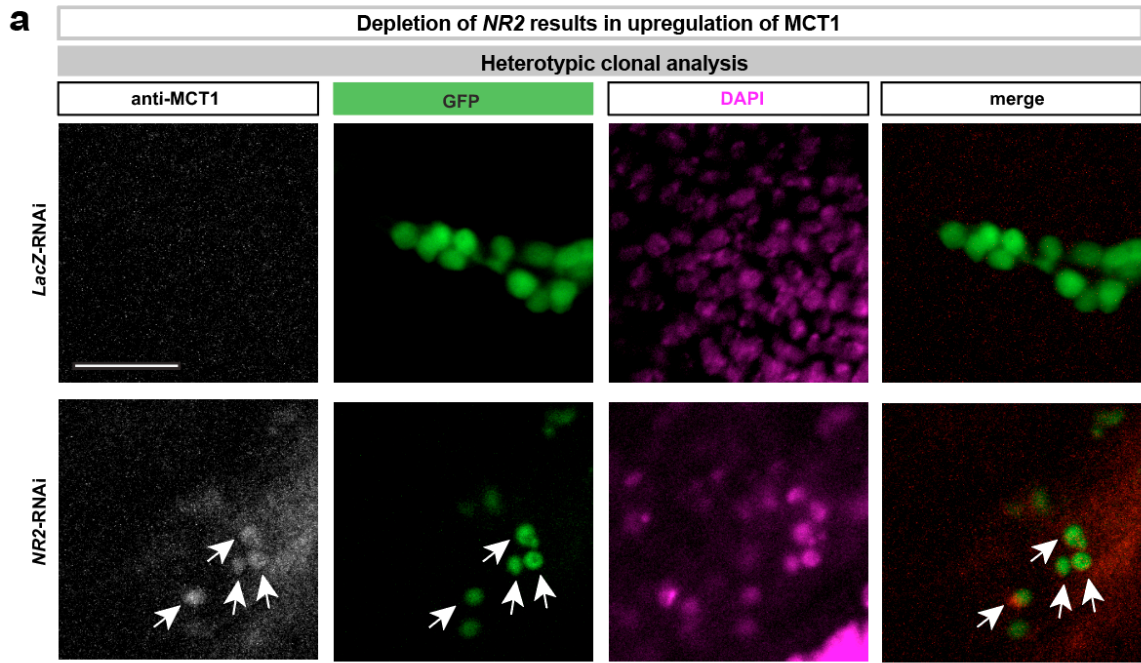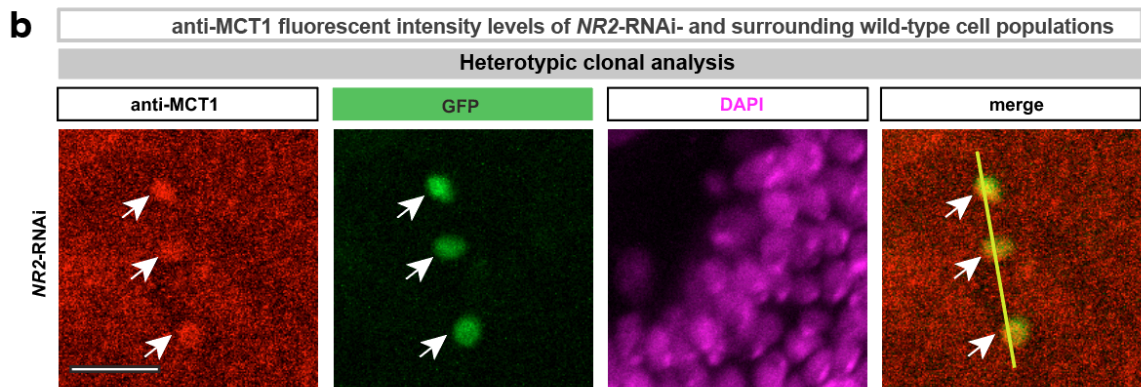

**c** Fluorescent signal intensity of GFP (*NR2*-RNAi) versus MCT1

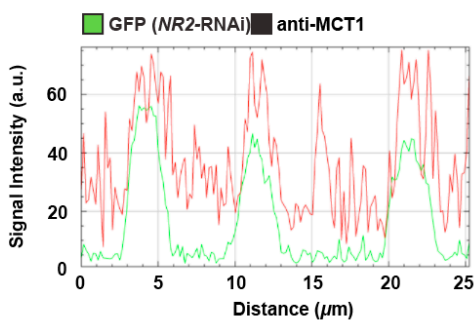

**d** Pearson's Correlation

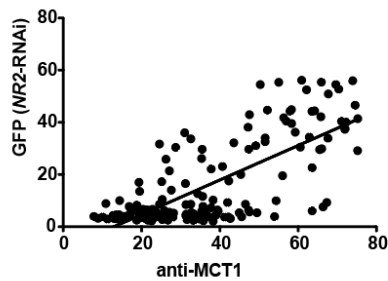

**e** Signal intensity of MCT1 in *NR2*-RNAi versus WT cells

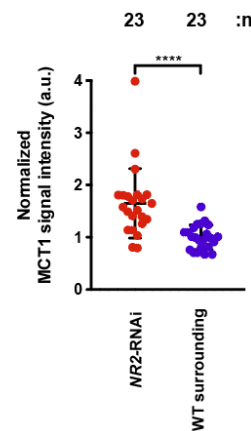

**Supplementary Figure 7. MCT1 is upregulated in *NR2* loser clones**

**a,b**, Confocal images of anti-MCT1 stained wing pouches. Scale bars 20  $\mu$ m (a) and 10  $\mu$ m (b). See Supplementary Table 1 for genotypes. **c**, Fluorescent intensities of anti-MCT1 (red) and GFP

(green) are measured by ImageJ software at the yellow line. **d**, Pearson's correlation analysis of anti-MCT1 and GFP. **e**, Fluorescent intensities (error bars) of anti-MCT1 are measured by ImageJ software  $\pm$  SD. \*\*\*\* $P < 0.0001$ , \*\*\* $P < 0.001$ , \*\* $P < 0.01$ , \* $P < 0.1$  by two-sided Mann-Whitney nonparametric *U*-test. n depicts the number of cells analysed. Experiments were repeated three independent times. See Supplementary Table 1 for genotypes.



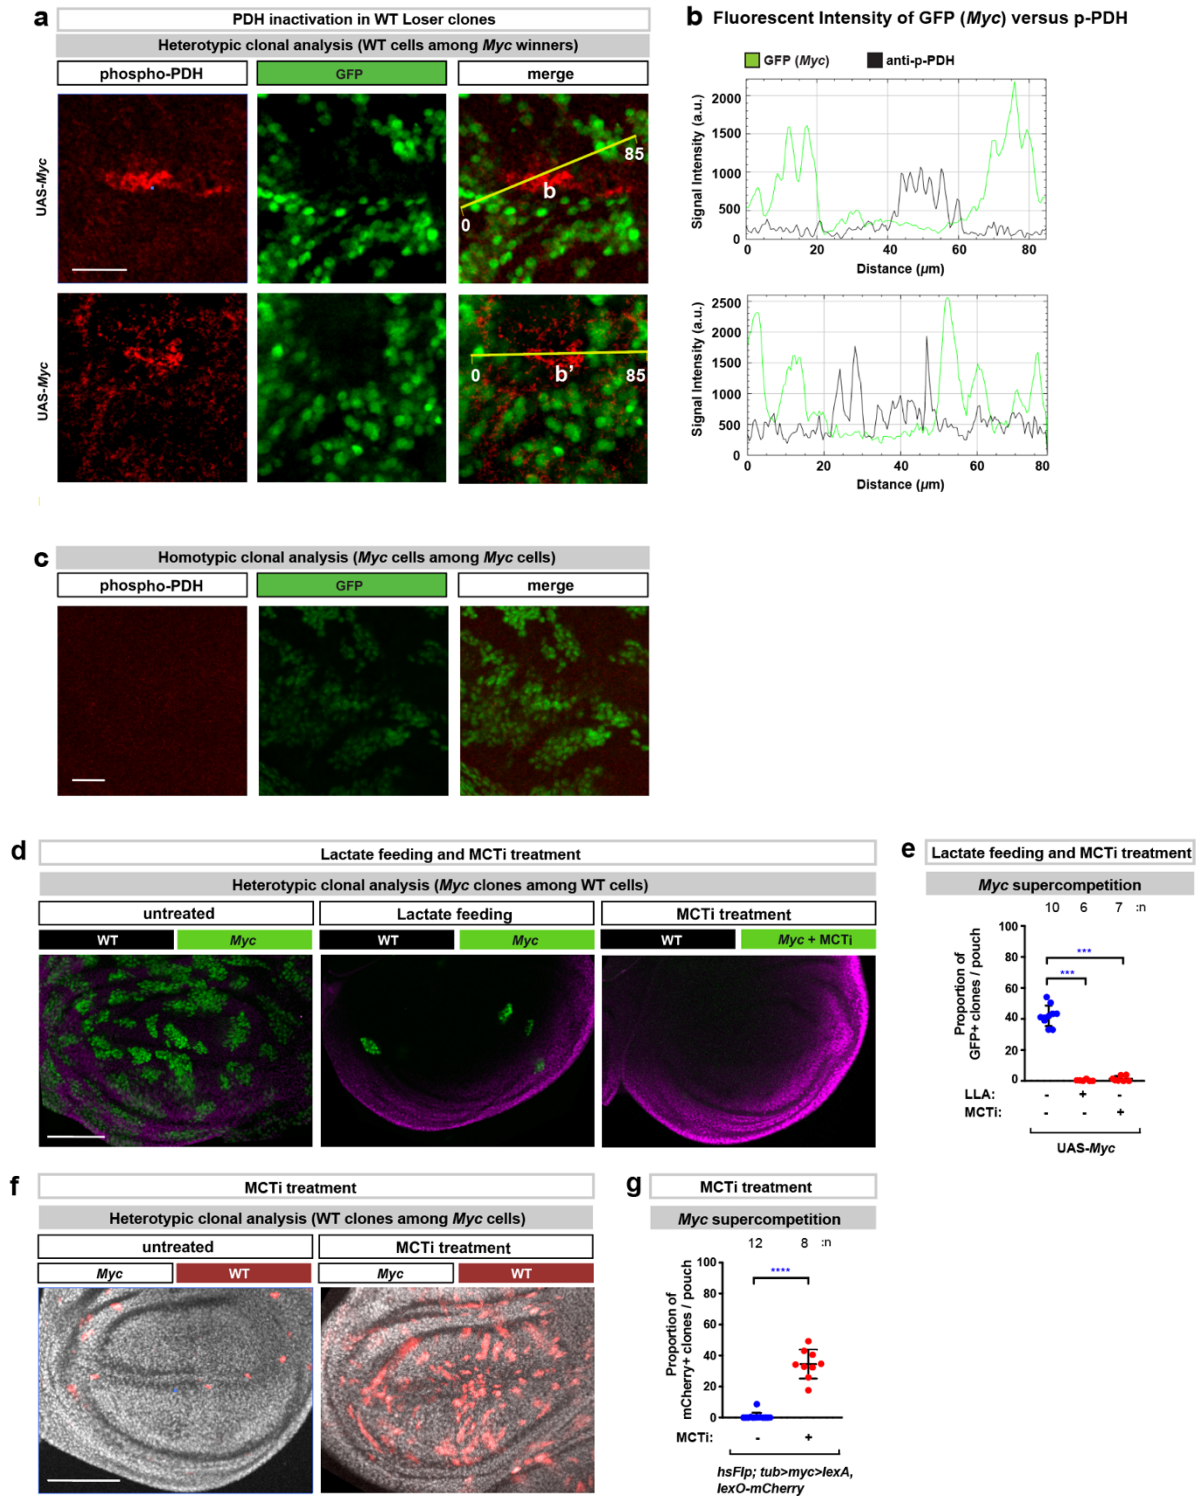

**Supplementary Figure 8. Lactate-mediated metabolic coupling occurs during loser/*Myc* supercompetition**

**a**, Heterotypic clonal analysis. Confocal images of dissected wing pouches stained for anti-phospho-PDH (reading out its inactivation). Scale bar 25  $\mu$ m. **b**, Fluorescent intensities of phospho-PDH (black) and GFP (green) are measured by ImageJ software at the yellow lines. **c**, Homotypic clonal analysis. Confocal images of dissected wing pouches stained for anti-phospho-PDH (reading out its inactivation). Scale bar 25  $\mu$ m. **d**, Heterotypic clonal analysis. *Myc* was over-expressed in *GFP*-marked clones. For

genotypes see Supplementary Data Table. Clones are marked by GFP (green). Lactate feeding and MCTi treatment was conducted as outlined in the Methods section. Scale bar 100  $\mu\text{m}$  **e**, Quantification of the Lactate (LLA) and MCTi treatment assays. **f**) Myc supercompetition assay. WT cells are marked with *mCherry*. Treatment with MCT1 inhibitor was conducted as outlined in the Methods section. Scale bar 100  $\mu\text{m}$ . **g**, Quantification of the MCTi treatment assay. See Supplementary Data Table for genotypes. Error bars represent average occupancy of the indicated UAS clones per wing pouch  $\pm$  SD. \*\*\*\* $P < 0.0001$ , \*\*\* $P < 0.001$ , \*\* $P < 0.01$ , \* $P < 0.1$  by two-sided Mann-Whitney nonparametric *U*-test. (e.: UAS-*Myc* LLA fed vs. UAS-*Myc* not treated \*\*\* $P$  value: 0.0002; UAS-*Myc* MCTi treated vs. UAS-*Myc* not treated \*\*\* $P$  value: 0.0001). *n* depicts the number of wing discs. See Supplementary Table 1 for genotypes.

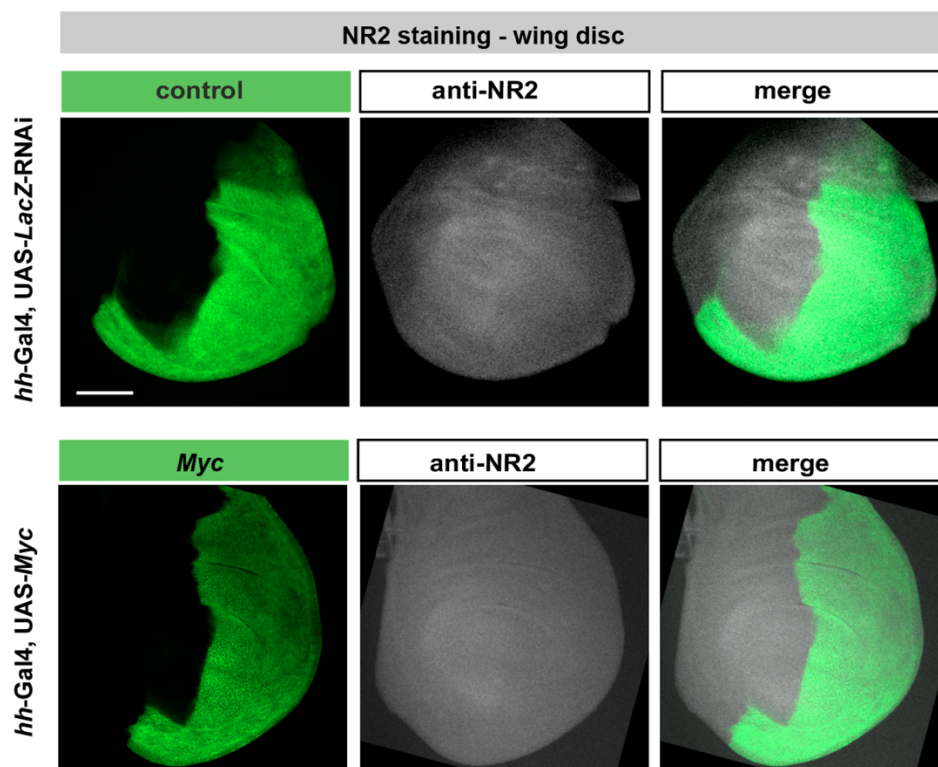

### Supplementary Figure 9. NR2 staining in the wing pouch

Antibody staining with anti-NR2 antibodies in wing discs in which Myc was over-expressed throughout the posterior compartment of the wing pouch (marked by GFP). Scale bar 100  $\mu\text{m}$ . See Supplementary Table 1 for genotypes.

**Supplementary Table 1. *Drosophila* genotypes used in this study**

**Main Figures**

| Figure: | Panel: | Genotype:                                                                                                                                                                                                                                                                                                                                                                                                                                                                                                                                                                                                                                                                                                                                                                                                                   |
|---------|--------|-----------------------------------------------------------------------------------------------------------------------------------------------------------------------------------------------------------------------------------------------------------------------------------------------------------------------------------------------------------------------------------------------------------------------------------------------------------------------------------------------------------------------------------------------------------------------------------------------------------------------------------------------------------------------------------------------------------------------------------------------------------------------------------------------------------------------------|
| 1       | c      | <ul style="list-style-type: none"> <li><i>hsFlp;UAS-LacZ-RNAi/+;act&gt;CD2&gt;Gal4,UAS-nEGFP/+</i></li> <li><i>hsFlp;+/+;act&gt;CD2&gt;Gal4,UAS-nEGFP/NR2<sup>GD3196</sup>-RNAi</i></li> <li><i>hsFlp;UAS-NR2-RNAi/+;act&gt;CD2&gt;Gal4,UAS-nEGFP/+</i></li> </ul>                                                                                                                                                                                                                                                                                                                                                                                                                                                                                                                                                          |
| 1       | d      | <ul style="list-style-type: none"> <li><i>hsFlp;UAS-LacZ-RNAi/+;act&gt;CD2&gt;Gal4,UAS-nEGFP/+</i></li> <li><i>hsFlp;+/+;act&gt;CD2&gt;Gal4,UAS-nEGFP/UAS-dlg1<sup>GD41136</sup>-RNAi</i></li> <li><i>hsFlp;UAS-scrib<sup>TRIP-GL00638</sup>-RNAi/+;act&gt;CD2&gt;Gal4,UAS-nEGFP/+</i></li> <li><i>hsFlp;+/+;act&gt;CD2&gt;Gal4,UAS-nEGFP/NR2<sup>GD3196</sup>-RNAi</i></li> <li><i>hsFlp;UAS-NR2<sup>TRIP-HMS02176</sup>-RNAi/+;act&gt;CD2&gt;Gal4,UAS-nEGFP/+</i></li> <li><i>hsFlp;UAS-NR2-RNAi/+;act&gt;CD2&gt;Gal4,UAS-nEGFP/+</i></li> <li><i>hsFlp;+/+;act&gt;CD2&gt;Gal4,UAS-nEGFP/NR2<sup>TRIP-HMS02012</sup>-RNAi</i></li> <li><i>hsFlp;+/+;act&gt;CD2&gt;Gal4,UAS-nEGFP/NR2<sup>TRIP-JF02044</sup>-RNAi</i></li> </ul>                                                                                           |
| 1       | e      | <ul style="list-style-type: none"> <li><i>hsFlp;UAS-LacZ-RNAi/nub-Gal4;ubi-p63E&gt;FRT.STOP.FRT&gt;Stringer(nEGFP)/+</i></li> <li><i>hsFlp;+ /nub-Gal4;ubi-p63E&gt;FRT.STOP.FRT&gt;Stringer(nEGFP)/NR2<sup>GD3196</sup>-RNAi</i></li> </ul>                                                                                                                                                                                                                                                                                                                                                                                                                                                                                                                                                                                 |
| 1       | f      | <ul style="list-style-type: none"> <li><i>hsFlp;UAS-LacZ-RNAi/+;act&gt;CD2&gt;Gal4,UAS-nEGFP/+</i></li> <li><i>hsFlp; UAS-LacZ-RNAi/nub-Gal4;ubi-p63E&gt;FRT.STOP.FRT&gt;Stringer(nEGFP)/+</i></li> <li><i>hsFlp;+ /nub-Gal4;ubi-p63E&gt;FRT.STOP.FRT&gt;Stringer(nEGFP)/UAS-dlg1<sup>GD41136</sup>-RNAi</i></li> <li><i>hsFlp; UAS-NR2<sup>TRIP-HMS02176</sup>-RNAi/nub-Gal4;ubi-p63E&gt;FRT.STOP.FRT&gt;Stringer(nEGFP)/+</i></li> <li><i>hsFlp;+ /nub-Gal4;ubi-p63E&gt;FRT.STOP.FRT&gt;Stringer(nEGFP)/NR2<sup>GD3196</sup>-RNAi</i></li> </ul>                                                                                                                                                                                                                                                                          |
| 1       | g      | <ul style="list-style-type: none"> <li><i>hsFlp; UAS-LacZ-RNAi/nub-Gal4;ubi-p63E&gt;FRT.STOP.FRT&gt;Stringer(nEGFP)/+</i></li> <li><i>hsFlp;UAS-LacZ-RNAi/+;Act&gt;CD2&gt;Gal4,UAS-nEGFP/+</i></li> <li><i>hsFlp;+ /nub-Gal4;ubi-p63E&gt;FRT.STOP.FRT&gt;Stringer(nEGFP)/UAS-dlg1<sup>GD41136</sup>-RNAi</i></li> <li><i>hsFlp;+ /+;act&gt;CD2&gt;Gal4,UAS-nEGFP/UAS-dlg1<sup>GD41136</sup>-RNAi</i></li> <li><i>hsFlp; UAS-NR2<sup>TRIP-HMS02176</sup>-RNAi/nub-Gal4;ubi-p63E&gt;FRT.STOP.FRT&gt;Stringer(nEGFP)/+</i></li> <li><i>hsFlp;UAS-NR2<sup>TRIP-HMS02176</sup>-RNAi/+;act&gt;CD2&gt;Gal4,UAS-nEGFP/+</i></li> <li><i>hsFlp;+ /nub-Gal4;ubi-p63E&gt;FRT.STOP.FRT&gt;Stringer(nEGFP)/UAS-NR2<sup>GD319</sup>-RNAi</i></li> <li><i>hsFlp;+ /+;act&gt;CD2&gt;Gal4,UAS-nEGFP/NR2<sup>GD3196</sup>-RNAi</i></li> </ul> |
| 1       | h-j    | <ul style="list-style-type: none"> <li><i>hsFlp;UAS-LacZ-RNAi/+;act&gt;CD2&gt;Gal4,UAS-nEGFP/+</i></li> <li><i>hsFlp;+ /+;act&gt;CD2&gt;Gal4,UAS-nEGFP/UAS-NR2</i></li> </ul>                                                                                                                                                                                                                                                                                                                                                                                                                                                                                                                                                                                                                                               |
| 2       | a-b    | <ul style="list-style-type: none"> <li><i>hsFlp;UAS-LacZ-RNAi/UAS-LacZ-RNAi;act&gt;CD2&gt;Gal4,UAS-nEGFP/+</i></li> <li><i>hsFlp;UAS-NR2<sup>TRIP-HMS02176</sup>-RNAi/UAS-LacZ-RNAi;act&gt;CD2&gt;Gal4,UAS-nEGFP/+</i></li> </ul>                                                                                                                                                                                                                                                                                                                                                                                                                                                                                                                                                                                           |

|   |     |                                                                                                                                                                                                                                                                                                                                                                                                                                                                                                                                                                                                                                                                                                                   |
|---|-----|-------------------------------------------------------------------------------------------------------------------------------------------------------------------------------------------------------------------------------------------------------------------------------------------------------------------------------------------------------------------------------------------------------------------------------------------------------------------------------------------------------------------------------------------------------------------------------------------------------------------------------------------------------------------------------------------------------------------|
| 2 | c   | <ul style="list-style-type: none"> <li>• <i>hsFlp;UAS-LacZ-RNAi/UAS-LacZ-RNAi;act&gt;CD2&gt;Gal4,UAS-nEGFP/+</i></li> <li>• <i>hsFlp;UAS-NR2<sup>TRIP-HMS02176</sup>-RNAi/UAS-LacZ-RNAi;act&gt;CD2&gt;Gal4,UAS-nEGFP/+</i></li> <li>• <i>hsFlp;UAS-NR2<sup>TRIP-HMS02176</sup>-RNAi/UAS-grnd-RNAi<sup>KK109939</sup>;act&gt;CD2&gt;Gal4,UAS-nEGFP/+</i></li> <li>• <i>hsFlp;UAS-NR2<sup>TRIP-HMS02176</sup>-RNAi/+;act&gt;CD2&gt;Gal4,UAS-nEGFP/UAS-hep<sup>GD26929</sup>-RNAi</i></li> <li>• <i>hsFlp;UAS-NR2<sup>TRIPHMS02176</sup>-RNAi/ UAS-bsk.DN;act&gt;CD2&gt;Gal4,UAS-nEGFP/+</i></li> <li>• <i>hsFlp;UAS-NR2<sup>TRIPHMS02176</sup>-RNAi/+;act&gt;CD2&gt;Gal4,UAS-nEGFP/UAS-p35,UAS-DIAP1</i></li> </ul> |
| 3 | a   | <ul style="list-style-type: none"> <li>• <i>hsFlp;UAS-NR2<sup>TRIP-HMS02176</sup>-RNAi/UAS-LacZ-RNAi;act&gt;CD2&gt;Gal4,UAS-nEGFP/+</i></li> <li>• <i>hsFlp;UAS-LacZ-RNAi/UAS-LacZ-RNAi;act&gt;CD2&gt;Gal4,UAS-nEGFP/+</i></li> </ul>                                                                                                                                                                                                                                                                                                                                                                                                                                                                             |
| 3 | b   | <ul style="list-style-type: none"> <li>• <i>hsFlp;UAS-NR2<sup>TRIP-HMS02176</sup>-RNAi/UAS-LacZ-RNAi;act&gt;CD2&gt;Gal4,UAS-nEGFP/+</i></li> </ul>                                                                                                                                                                                                                                                                                                                                                                                                                                                                                                                                                                |
| 3 | c   | <ul style="list-style-type: none"> <li>• <i>hsFlp;UAS-NR2<sup>TRIP-HMS02176</sup>-RNAi/UAS-LacZ-RNAi;act&gt;CD2&gt;Gal4,UAS-nEGFP/+</i></li> <li>• <i>hsFlp;UAS-LacZ-RNAi/UAS-LacZ-RNAi;act&gt;CD2&gt;Gal4,UAS-nEGFP/+</i></li> <li>• <i>hsFlp;UAS-NR2<sup>TRIPHMS02176</sup>-RNAi/ UAS-bskDN;act&gt;CD2&gt;Gal4,UAS-nEGFP/+</i></li> </ul>                                                                                                                                                                                                                                                                                                                                                                       |
| 3 | d-e | <ul style="list-style-type: none"> <li>• <i>hsFlp;UAS-LacZ-RNAi/UAS-LacZ-RNAi;act&gt;CD2&gt;Gal4,UAS-nEGFP/+</i></li> <li>• <i>hsFlp;UAS-NR2<sup>TRIP-HMS02176</sup>-RNAi/UAS-LacZ-RNAi;act&gt;CD2&gt;Gal4,UAS-nEGFP/+</i></li> <li>• <i>hsFlp;UAS-NR2<sup>TRIP-HMS02176</sup>-RNAi/+;act&gt;CD2&gt;Gal4,UAS-nEGFP/Pdk-RNAi<sup>TRIPGL00009</sup></i></li> <li>• <i>hsFlp;UAS-NR2<sup>TRIP-HMS02176</sup>-RNAi/UAS-Pdh;act&gt;CD2&gt;Gal4,UAS-nEGFP/+</i></li> </ul>                                                                                                                                                                                                                                              |
| 4 | b   | <ul style="list-style-type: none"> <li>• <i>hsFlp; nub-Gal4, UAS-LactateFRET/tub&gt;CD2&gt;lexA,lexO-mCherry; lexO-LacZ/+</i></li> <li>• <i>hsFlp; nub-Gal4, UAS-LactateFRET/tub&gt;CD2&gt;lexA,lexO-mCherry; lexO-NR2-RNAi/+</i></li> </ul>                                                                                                                                                                                                                                                                                                                                                                                                                                                                      |
| 4 | c   | <ul style="list-style-type: none"> <li>• <i>hsFlp;UAS-LacZ-RNAi/ UAS-LactateFRET;act&gt;CD2&gt;Gal4,UAS-nEGFP/+</i></li> <li>• <i>hsFlp;UAS-NR2<sup>TRIPHMS02176</sup>-RNAi,UAS-LactateFRET/+;act&gt;CD2&gt;Gal4,UAS-nEGFP/+</i></li> <li>• <i>hsFlp;UAS-NR2<sup>TRIPHMS02176</sup>-RNAi,UAS-LactateFRET/UAS-dMct1<sup>KK108618</sup>;act&gt;CD2&gt;Gal4,UAS-nEGFP/+</i></li> <li>• <i>hsFlp;UAS-LacZ-RNAi,UAS-LactateFRET/UAS-dMct1<sup>KK108618</sup>;act&gt;CD2&gt;Gal4,UAS-nEGFP/+</i></li> </ul>                                                                                                                                                                                                             |
| 4 | d   | <ul style="list-style-type: none"> <li>• <i>hsFlp; nub-Gal4, UAS-LactateFRET/tub&gt;CD2&gt;lexA,lexO-mCherry; lexO-LacZ/+</i></li> <li>• <i>hsFlp; nub-Gal4, UAS-LactateFRET/tub&gt;CD2&gt;lexA,lexO-mCherry; lexO-NR2-RNAi/+</i></li> </ul>                                                                                                                                                                                                                                                                                                                                                                                                                                                                      |
| 4 | e   | <ul style="list-style-type: none"> <li>• <i>hsFlp;UAS-LacZ-RNAi/ UAS-LactateFRET;act&gt;CD2&gt;Gal4,UAS-nEGFP/+</i></li> </ul>                                                                                                                                                                                                                                                                                                                                                                                                                                                                                                                                                                                    |

|   |       |                                                                                                                                                                                                                                                                                                                                                                                                                                                                                                                                                                                                                                                                                                                                                                                                                                                                                                                                                                                                         |
|---|-------|---------------------------------------------------------------------------------------------------------------------------------------------------------------------------------------------------------------------------------------------------------------------------------------------------------------------------------------------------------------------------------------------------------------------------------------------------------------------------------------------------------------------------------------------------------------------------------------------------------------------------------------------------------------------------------------------------------------------------------------------------------------------------------------------------------------------------------------------------------------------------------------------------------------------------------------------------------------------------------------------------------|
|   |       | <ul style="list-style-type: none"> <li>• <i>hsFlp;UAS-NR2<sup>TRIP-HMS02176</sup>-RNAi/UAS-LactateFRET;act&gt;CD2&gt;Gal4,UAS-nEGFP/+</i></li> </ul>                                                                                                                                                                                                                                                                                                                                                                                                                                                                                                                                                                                                                                                                                                                                                                                                                                                    |
| 5 | a     | <ul style="list-style-type: none"> <li>• <i>hsFlp;UAS-NR2<sup>TRIP-HMS02176</sup>-RNAi/UAS-LacZ-RNAi;act&gt;CD2&gt;Gal4,UAS-nEGFP/+</i></li> </ul>                                                                                                                                                                                                                                                                                                                                                                                                                                                                                                                                                                                                                                                                                                                                                                                                                                                      |
| 5 | b     | <ul style="list-style-type: none"> <li>• <i>hsFlp;UAS-NR2<sup>TRIP-HMS02176</sup>-RNAi/+;act&gt;CD2&gt;Gal4,UAS-nEGFP/UAS-impL3<sup>GD31192</sup>-RNAi</i></li> <li>• <i>hsFlp;UAS-NR2<sup>TRIP-HMS02176</sup>-RNAi/UAS-dMct1<sup>KK108618</sup>-RNAi;act&gt;CD2&gt;Gal4,UAS-nEGFP/+</i></li> <li>• <i>hsFlp;UAS-NR2<sup>TRIP-HMS02176</sup>-RNAi/UAS-LacZ-RNAi;act&gt;CD2&gt;Gal4,UAS-nEGFP/+</i></li> </ul>                                                                                                                                                                                                                                                                                                                                                                                                                                                                                                                                                                                           |
| 5 | c     | <ul style="list-style-type: none"> <li>• <i>hsFlp; UAS-LacZ-RNAi/UAS-LacZ-RNAi;act&gt;CD2&gt;Gal4,UAS-nEGFP/+</i></li> <li>• <i>hsFlp;UAS-NR2<sup>TRIP-HMS02176</sup>-RNAi/UAS-LacZ-RNAi;act&gt;CD2&gt;Gal4,UAS-nEGFP/+</i></li> <li>• <i>hsFlp;UAS-NR2<sup>TRIP-HMS02176</sup>-RNAi/UAS-impL3<sup>KK110190</sup>-RNAi;act&gt;CD2&gt;Gal4,UAS-nEGFP/+</i></li> <li>• <i>hsFlp;UAS-NR2<sup>TRIP-HMS02176</sup>-RNAi/+;act&gt;CD2&gt;Gal4,UAS-nEGFP/UAS-impL3<sup>GD31192</sup>-RNAi</i></li> <li>• <i>hsFlp;UAS-NR2<sup>TRIP-HMS02176</sup>-RNAi/UAS-dMct1<sup>KK108618</sup>-RNAi;act&gt;CD2&gt;Gal4,UAS-nEGFP/+</i></li> <li>• <i>hsFlp;UAS-NR2<sup>TRIP-HMS02176</sup>-RNAi/UAS-LacZ-RNAi;act&gt;CD2&gt;Gal4,UAS-nEGFP/+</i></li> <li>• <i>hsFlp;UAS-NR2<sup>TRIP-HMS02176</sup>-RNAi/UAS-CG13907<sup>KK107339</sup>-RNAi;act&gt;CD2&gt;Gal4,UAS-nEGFP/+</i></li> <li>• <i>hsFlp;UAS-NR2<sup>TRIP-HMS02176</sup>-RNAi/+;act&gt;CD2&gt;Gal4,UAS-nEGFP/UAS-CG3409<sup>GD37139</sup>-RNAi</i></li> </ul> |
| 6 | a-c,f | <ul style="list-style-type: none"> <li>• <i>hsFlp;UAS-LacZ-RNAi/+;act&gt;CD2&gt;Gal4,UAS-nEGFP/+</i></li> <li>• <i>hsFlp;UAS-Myc/+;act&gt;CD2&gt;Gal4,UAS-nEGFP/+</i></li> </ul>                                                                                                                                                                                                                                                                                                                                                                                                                                                                                                                                                                                                                                                                                                                                                                                                                        |
| 6 | d-e   | <ul style="list-style-type: none"> <li>• <i>hsFlp; nub-Gal4, UAS-LactateFRET/tub&gt;CD2&gt;lexA,lexO-mCherry;</i></li> <li>• <i>hsFlp; nub-Gal4, UAS-LactateFRET/tub&gt;myc&gt;lexA,lexO-mCherry;</i></li> </ul>                                                                                                                                                                                                                                                                                                                                                                                                                                                                                                                                                                                                                                                                                                                                                                                        |
| 7 | a-e   | <ul style="list-style-type: none"> <li>• <i>hsFlp;UAS-LacZ-RNAi/UAS-LacZ-RNAi;act&gt;CD2&gt;Gal4,UAS-nEGFP/+</i></li> <li>• <i>hsFlp;UAS-Myc/UAS-LacZ-RNAi;act&gt;CD2&gt;Gal4,UAS-nEGFP/+</i></li> </ul>                                                                                                                                                                                                                                                                                                                                                                                                                                                                                                                                                                                                                                                                                                                                                                                                |
| 7 | f-g   | <ul style="list-style-type: none"> <li>• <i>NR2-Gal4; UAS-GFP</i></li> </ul>                                                                                                                                                                                                                                                                                                                                                                                                                                                                                                                                                                                                                                                                                                                                                                                                                                                                                                                            |
| 8 | a     | <ul style="list-style-type: none"> <li>• <i>hsFlp;UAS-LacZ-RNAi/ UAS-LacZ-RNAi;act&gt;CD2&gt;Gal4,UAS-nEGFP/+</i></li> <li>• <i>hsFlp;UAS-Myc/UAS-LacZ-RNAi;act&gt;CD2&gt;Gal4,UAS-nEGFP/+</i></li> <li>• <i>hsFlp;UAS-Myc/UAS-NR2<sup>TRIP-HMS02176</sup>-RNAi;act&gt;CD2&gt;Gal4,UAS-nEGFP/+</i></li> </ul>                                                                                                                                                                                                                                                                                                                                                                                                                                                                                                                                                                                                                                                                                           |
| 8 | b     | <ul style="list-style-type: none"> <li>• <i>hsFlp;UAS-LacZ-RNAi/ UAS-LacZ-RNAi;act&gt;CD2&gt;Gal4,UAS-nEGFP/+</i></li> <li>• <i>hsFlp;UAS-NR2<sup>TRIP-HMS02176</sup>-RNAi/UAS-LacZ-RNAi;act&gt;CD2&gt;Gal4,UAS-nEGFP/+</i></li> <li>• <i>hsFlp;UAS-Myc/UAS-LacZ-RNAi;act&gt;CD2&gt;Gal4,UAS-nEGFP/+</i></li> <li>• <i>hsFlp;UAS-Myc/UAS-NR2<sup>TRIP-HMS02176</sup>-RNAi;act&gt;CD2&gt;Gal4,UAS-nEGFP/+</i></li> </ul>                                                                                                                                                                                                                                                                                                                                                                                                                                                                                                                                                                                 |
| 8 | c     | <ul style="list-style-type: none"> <li>• <i>hsFlp;UAS-LacZ-RNAi/+;act&gt;CD2&gt;Gal4,UAS-nEGFP/+</i></li> </ul>                                                                                                                                                                                                                                                                                                                                                                                                                                                                                                                                                                                                                                                                                                                                                                                                                                                                                         |



|   |     |                                                                                                                                                                                                                                                                                                                                                                                                                                    |
|---|-----|------------------------------------------------------------------------------------------------------------------------------------------------------------------------------------------------------------------------------------------------------------------------------------------------------------------------------------------------------------------------------------------------------------------------------------|
|   |     | <ul style="list-style-type: none"> <li>• <i>hsFlp;UAS-LacZ-RNAi/nub-Gal4;ubi-p63E&gt;STOP&gt;Stringer(nEGFP)/+</i></li> <li>• <i>hsFlp;+/nub-Gal4;ubi-p63E&gt;STOP&gt;Stringer(nEGFP)/NR2<sup>GD3196</sup>-RNAi</i></li> <li>• <i>hsFlp;UAS-Myc,UAS-LacZ-RNAi/nub-Gal4;ubi-p63E&gt;STOP&gt;Stringer(nEGFP)/+</i></li> <li>• <i>hsFlp;UAS-Myc/nub-Gal4;ubi-p63E&gt;STOP&gt;Stringer(nEGFP)/NR2<sup>GD3196</sup>-RNAi</i></li> </ul> |
| 8 | d   | <ul style="list-style-type: none"> <li>• <i>hsFlp;UAS-Myc/UAS-LacZ-RNAi;act&gt;CD2&gt;Gal4,UAS-nEGFP/+</i></li> <li>• <i>hsFlp;UAS-Myc/UAS-NR2<sup>TRIP-HMS02176</sup>-RNAi;act&gt;CD2&gt;Gal4,UAS-nEGFP/+</i></li> </ul>                                                                                                                                                                                                          |
| 8 | e-f | <ul style="list-style-type: none"> <li>• <i>hsFlp; tub&gt;CD2&gt;Gal4/nub-lexA; UAS-GFP/lexO-RFP-RNAi</i></li> <li>• <i>hsFlp;tub&gt;myc y+&gt;Gal4, UAS-GFP/nub-LexA; lexO-RFP-RNAi/+</i></li> <li>• <i>hsFlp;tub&gt;myc y+&gt;Gal4, UAS-GFP/nub-LexA; lexO-NR2-RNAi/+</i></li> </ul>                                                                                                                                             |
| 8 | g   | <ul style="list-style-type: none"> <li>• <i>hsFlp;UAS-Myc/LacZ-RNAi;act&gt;CD2&gt;Gal4,UAS-nEGFP/+</i></li> </ul>                                                                                                                                                                                                                                                                                                                  |
| 8 | h   | <ul style="list-style-type: none"> <li>• <i>hsFlp; LacZ-RNAi/LacZ-RNAi;act&gt;CD2&gt;Gal4,UAS-nEGFP/+</i></li> <li>• <i>hsFlp;UAS-Myc/LacZ-RNAi;act&gt;CD2&gt;Gal4,UAS-nEGFP/+</i></li> <li>• <i>hsFlp; LacZ-RNAi/nub-Gal4;ubi-p63E&gt;STOP&gt;Stringer(nEGFP)/+</i></li> <li>• <i>hsFlp;UAS-Myc/nub-Gal4;ubi-p63E&gt;STOP&gt;Stringer(nEGFP)/+</i></li> </ul>                                                                     |

### Supplementary Data Figures

|    |     |                                                                                                                                                                                                                                       |
|----|-----|---------------------------------------------------------------------------------------------------------------------------------------------------------------------------------------------------------------------------------------|
| S1 | a   | <ul style="list-style-type: none"> <li>• <i>W1118</i></li> </ul>                                                                                                                                                                      |
| S1 | b   | <ul style="list-style-type: none"> <li>• <i>NR2<sup>MI09281-GFSTF.2</sup>,+;+</i></li> </ul>                                                                                                                                          |
| S1 | c   | <ul style="list-style-type: none"> <li>• <i>hsFlp;+/UAS-NR2<sup>TRIP-HMS02176</sup>-RNAi;act&gt;CD2&gt;Gal4,UAS-nEGFP/+</i></li> </ul>                                                                                                |
| S2 | a   | <ul style="list-style-type: none"> <li>• <i>hsFlp;+/+;act&gt;CD2&gt;Gal4,UAS-nEGFP/UAS-dlg1<sup>GD41136</sup>-RNAi</i></li> <li>• <i>hsFlp;UAS-scrib<sup>TRIP-GL00638</sup>-RNAi/+;act&gt;CD2&gt;Gal4,UAS-nEGFP/+</i></li> </ul>      |
| S2 | b   | <ul style="list-style-type: none"> <li>• <i>hsFlp;+/nub-Gal4;Ubi-p63E&gt;STOP&gt;Stringer(nEGFP)/UAS-dlg1<sup>GD41136</sup>-RNAi</i></li> </ul>                                                                                       |
| S2 | c   | <ul style="list-style-type: none"> <li>• <i>w1118;UAS-GFP/LacZ-RNAi;hh-Gal4/+</i></li> <li>• <i>w1118;UAS-GFP/ UAS-NR2<sup>TRIP-HMS02176</sup>-RNAi;hh-Gal4/+</i></li> </ul>                                                          |
| S3 | a,b | <ul style="list-style-type: none"> <li>• <i>hsFlp;UAS-LacZ-RNAi/+;act&lt;CD2&lt;Gal4,UAS-nEGFP/+</i></li> <li>• <i>hsFlp;+/+;act&gt;CD2&gt;Gal4,UAS-nEGFP/NR2<sup>TRIP-HMS02012</sup>-RNAi</i></li> </ul>                             |
| S4 | a   | <ul style="list-style-type: none"> <li>• <i>hsFlp;UAS-NR2<sup>TRIP-HMS02176</sup>-RNAi/UAS-LacZ-RNAi;act&gt;CD2&gt;Gal4,UAS-nEGFP/pucE69 (puc-LacZ)</i></li> </ul>                                                                    |
| S4 | b   | <ul style="list-style-type: none"> <li>• <i>hsFlp;UAS-LacZ-RNAi/UAS-LacZ-RNA;act&gt;CD2&gt;Gal4,UAS-nEGFP/+</i></li> <li>• <i>hsFlp;UAS-NR2<sup>TRIP-HMS02176</sup>-RNAi/UAS-LacZ-RNAi;act&gt;CD2&gt;Gal4,UAS-nEGFP/+</i></li> </ul>  |
| S5 | a   | <ul style="list-style-type: none"> <li>• <i>hsFlp;UAS-bsk-WT;act&gt;y&gt;UAS-LacZ</i></li> </ul>                                                                                                                                      |
| S5 | b-d | <ul style="list-style-type: none"> <li>• <i>hsFlp;UAS-LacZ-RNAi/UAS-LacZ-RNAi;act&gt;CD2&gt;Gal4,UAS-nEGFP/+</i></li> <li>• <i>hsFlp;UAS-NR2<sup>TRIP-HMS02176</sup>-RNAi/UAS-LacZ-RNAi;act&lt;CD2&lt;Gal4,UAS-nEGFP/+</i></li> </ul> |

|           |            |                                                                                                                                                                                                                                                        |
|-----------|------------|--------------------------------------------------------------------------------------------------------------------------------------------------------------------------------------------------------------------------------------------------------|
|           |            |                                                                                                                                                                                                                                                        |
| <b>S5</b> | <b>e</b>   | <ul style="list-style-type: none"> <li>• <i>hsFlp; UAS-NR2<sup>TRIP-HMS02176</sup>-RNAi/nub-Gal4;ubi-p63E&gt;FRT.STOP.FRT&gt;Stringer(nEGFP)/+</i></li> </ul>                                                                                          |
| <b>S5</b> | <b>f</b>   | <ul style="list-style-type: none"> <li>• <i>hsFlp;UAS-LacZ-RNAi/UAS-LacZ-RNAi;act&gt;CD2&gt;Gal4,UAS-nEGFP/+</i></li> <li>• <i>hsFlp;UAS-NR2<sup>TRIP-HMS02176</sup>-RNAi/+;act&gt;CD2&gt;Gal4,UAS-nEGFP/Pdk-RNAi<sup>TRIPGL00009</sup></i></li> </ul> |
| <b>S6</b> | <b>a-b</b> | <ul style="list-style-type: none"> <li>• <i>hsFlp;UAS-NR2<sup>TRIP-HMS02176</sup>-RNAi/UAS-Pdh;act&gt;CD2&gt;Gal4,UAS-nEGFP/+</i></li> </ul>                                                                                                           |
| <b>S7</b> | <b>a-d</b> | <ul style="list-style-type: none"> <li>• <i>hsFlp;UAS-LacZ-RNAi/+;act&gt;CD2&gt;Gal4,UAS-nEGFP/+</i></li> <li>• <i>hsFlp;UAS-NR2<sup>TRIP-HMS02176</sup>-RNAi/+;act&lt;&gt;CD2&gt;Gal4,UAS-nEGFP/+</i></li> </ul>                                      |
| <b>S7</b> | <b>e</b>   | <ul style="list-style-type: none"> <li>• <i>hsFlp;UAS-NR2<sup>TRIP-HMS02176</sup>-RNAi/+;act&lt;&gt;CD2&gt;Gal4,UAS-nEGFP/+</i></li> </ul>                                                                                                             |
| <b>S8</b> | <b>a,b</b> | <ul style="list-style-type: none"> <li>• <i>hsFlp;UAS-Myc/+;act&gt;CD2&gt;Gal4,UAS-nEGFP/+</i></li> </ul>                                                                                                                                              |
| <b>S8</b> | <b>c</b>   | <ul style="list-style-type: none"> <li>• <i>hsFlp;UAS-Myc,UAS-LacZ-RNAi/nub-Gal4;ubi-p63E&gt;STOP&gt;Stringer(nEGFP)/+</i></li> </ul>                                                                                                                  |
|           | <b>d,e</b> | <ul style="list-style-type: none"> <li>• <i>hsFlp;UAS-Myc/+;act&gt;CD2&gt;Gal4,UAS-nEGFP/+</i></li> </ul>                                                                                                                                              |
| <b>S8</b> | <b>f-g</b> | <ul style="list-style-type: none"> <li>• <i>hsFlp; tub&gt;myc&gt;lexA,lexO-mCherry;</i></li> </ul>                                                                                                                                                     |
| <b>S9</b> |            | <ul style="list-style-type: none"> <li>• <i>w1118;UAS-GFP/LacZ-RNAi;hh-Gal4/+</i></li> <li>• <i>w1118;UAS-GFP/LacZ-RNAi;hh-Gal4/+</i></li> </ul>                                                                                                       |
